# Supplementary material for: Postoperative apnea after pyloromyotomy for infantile hypertrophic pyloric stenosis
Source: HighWire-hosted journal article supplement (doi:10.1136/wjps-2021-000391), 2022-05-01
Supplement: wjps-2021-000391supp001_data_supplement.pdf [file wjps-2021-000391supp001_data_supplement.pdf]

## Annex Section

Serum Electrolyte values in the Apnea and No Apnea Groups, according to Blood Gas Analysis in samples drawn on admission, before surgery (preoperative) and after recovery from anesthesia (postoperative). Data are presented as  $n \pm SD$ [median(IQR)]. P values apply to the apnea vs no-apnea comparison (Likelihood Ratio test).

|                      | All                                          | Apnea group                                  | No Apnea group                               | P value |
|----------------------|----------------------------------------------|----------------------------------------------|----------------------------------------------|---------|
| <b>Admission</b>     |                                              |                                              |                                              |         |
| Na, mEq/L            | 136.72 $\pm$ 2.90<br>[137.00(135.00-139.00)] | 138.00 $\pm$ 3.02<br>[138.50(138.00-139.25)] | 136.60 $\pm$ 2.88<br>[137.00(135.00-138.00)] | 0.19    |
| K, mEq/l             | 4.73 $\pm$ 0.97<br>[4.70(4.20-5.10)]         | 4.41 $\pm$ 0.96<br>[4.20(4.02-4.60)]         | 4.76 $\pm$ 0.97<br>[4.70(4.30-5.10)]         | 0.33    |
| Cl, mEq/l            | 100.42 $\pm$ 6.58<br>[102.00(98.00-105.00)]  | 98.62 $\pm$ 9.62<br>[102.50(96.00-104.25)]   | 100.61 $\pm$ 6.24<br>[102.00(98.00-105.00)]  | 0.41    |
| <b>Preoperative</b>  |                                              |                                              |                                              |         |
| Na, mEq/L            | 137.02 $\pm$ 2.03<br>[137.00(136.00-138.00)] | 137.75 $\pm$ 1.71<br>[137.50(136.75-138.50)] | 139.96 $\pm$ 2.06<br>[137.00(136.00-138.00)] | 0.45    |
| K, mEq/l             | 4.55 $\pm$ 0.94<br>[4.60(3.80-5.20)]         | 3.70 $\pm$ 0.57<br>[3.75(3.38-4.08)]         | 4.62 $\pm$ 0.93<br>[4.70(3.80-5.20)]         | 0.08    |
| Cl, mEq/l            | 102.52 $\pm$ 4.62<br>[103.00(100.25-105.00)] | 101.00 $\pm$ 4.24<br>[102.50(99.50-104.00)]  | 102.67 $\pm$ 4.67<br>[103.00(100.25-105.75)] | 0.49    |
| <b>Postoperative</b> |                                              |                                              |                                              |         |
| Na, mEq/L            | 137.81 $\pm$ 2.5<br>[138.00(137.00-139.25)]  | 138.29 $\pm$ 3.25<br>[137.00(137.00-139.50)] | 137.75 $\pm$ 2.48<br>[138.00(137.00-139.00)] | 0.59    |
| K, mEq/l             | 4.61 $\pm$ 0.76<br>[4.60(4.00-5.10)]         | 4.20 $\pm$ 0.54<br>[4.20(3.85-4.60)]         | 4.66 $\pm$ 0.77<br>[4.65(4.00-5.25)]         | 0.14    |
| Cl, mEq/l            | 105.25 $\pm$ 4.81<br>[106.00(103.00-109.00)] | 104.50 $\pm$ 6.86<br>[106.50(101.75-109.25)] | 105.31 $\pm$ 4.71<br>[106.00(103.00-108.25)] | 0.74    |
